# Supplementary material for: No evidence of ongoing evolution in replication competent latent HIV-1 in a patient followed up for two years
Source: PubMed Central journal article supplement (PMC5805784; doi:10.1038/s41598-018-20682-w), 2018-02-08
Supplement: 41598_2018_20682_MOESM1_ESM.pdf [file 41598_2018_20682_MOESM1_ESM.pdf]

## Supplementary material

No evidence of ongoing evolution in replication competent latent HIV-1 in a patient followed up for two years

Hoi Ping MOK<sup>1</sup>, Nicholas J NORTON<sup>1</sup>, Jack C HIRST<sup>1</sup>, Axel FUN<sup>1</sup>, Mikaila BANDARA<sup>1</sup>, Mark R WILLS<sup>1</sup>, Andrew ML LEVER<sup>1,2\*</sup>

Affiliations; <sup>1</sup> Department of Medicine, University of Cambridge, Cambridge, UK. <sup>2</sup> Yong Loo Lin School of Medicine, Singapore, Singapore

\*Corresponding author. Mailing address: Department of Medicine, Level 5, Box 157, Addenbrooke's Hospital, Hills Road, Cambridge, UK, CB2 0QQ, Telephone: +44 (0)1223 330191  
E-mail: [aml11@medschl.cam.ac.uk](mailto:aml11@medschl.cam.ac.uk)

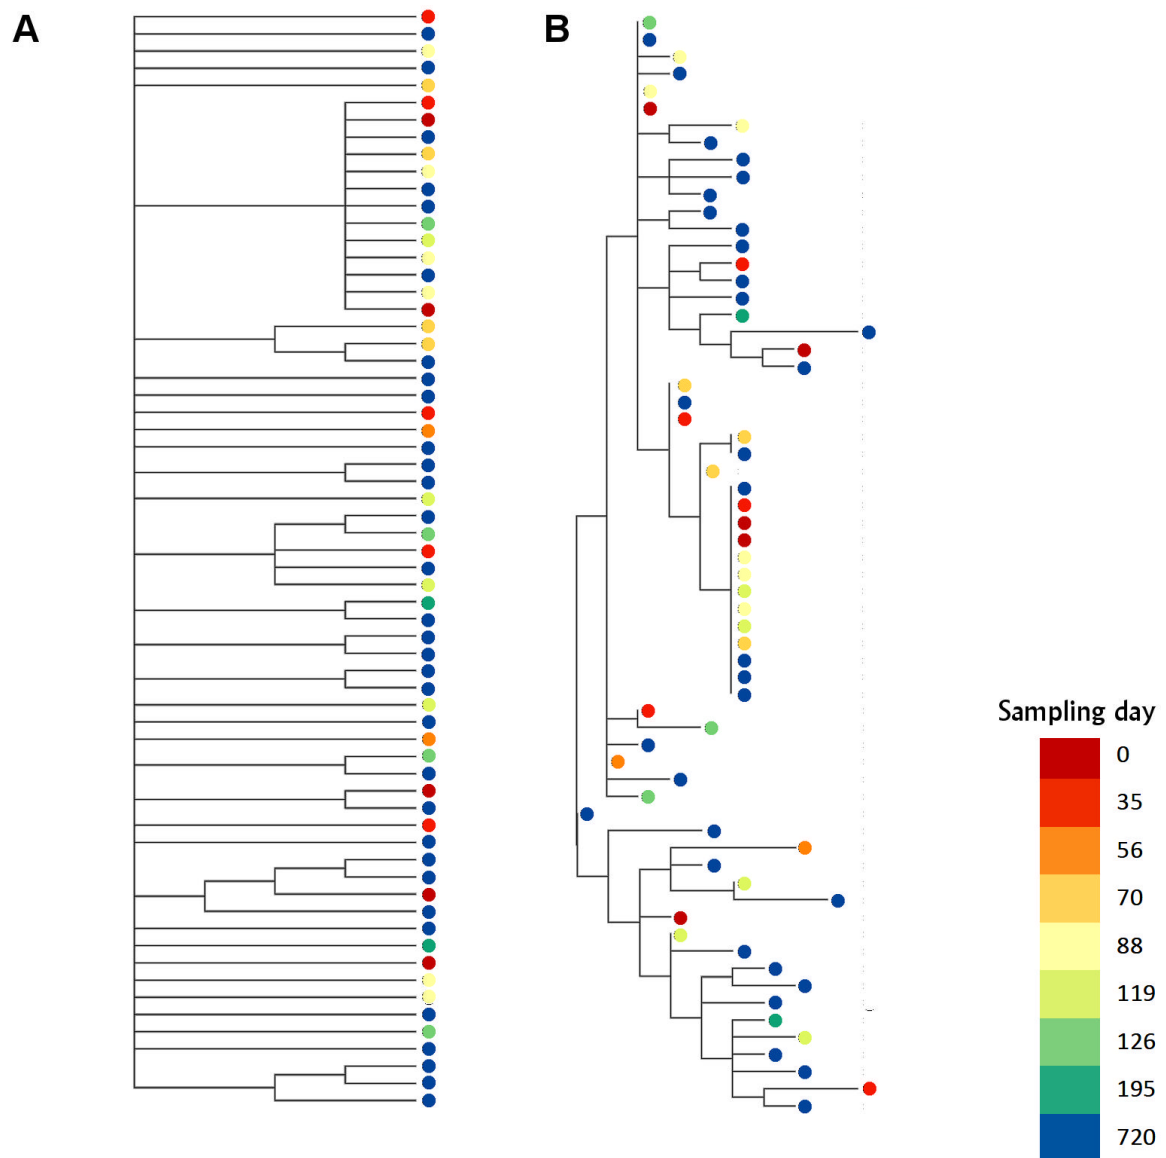

Supplementary figure 1

A. Maximum parsimony tree of *gag* sequences from reactivated patient viruses. The consensus tree inferred from 3 most parsimonious trees is shown. B. Maximum likelihood tree of *gag* sequences from reactivated patient viruses. Branch lengths show the number of substitutions per site.
